# Supplementary material for: Probing the effect of clustering on EphA2 receptor signaling efficiency by subcellular control of ligand-receptor mobility
Source: eLife. 2021 Aug 20;10:e67379. doi: 10.7554/eLife.67379 (PMC8397371; doi:10.7554/eLife.67379)
Supplement: Figure 2—source data 1. [file elife-67379-fig2-data1.xlsx]

## Sheet: Sheet1
			fluid_pEphA2	cell #	EphA2/Immobile ephrinA1	EphA2/Mobile ephrinA1		pY588-EphA2/Immobile ephrinA1	pY588-EphA2/Mobile ephrinA1
				1	6.33173	5.10005		2.43423	2.94147
cell01	1	616	5316.77	2	7.19729	7.09731		1.58697	2.42532
	2	616	4362.55	3	3.30861	2.48383		2.14567	3.5065
	3	616	3013.48	4	4.72854	3.84087		0.688071	1.09825
	4	616	4705.2	5	3.40981	2.95797		0.688815	0.940828
	5	616	3184.1	6	6.7471	5.56578		0.820356	1.66384
	6	616	4125.04	7	3.65133	3.52343		0.542877	1.03615
	7	616	5871.51	8	2.74174	2.51383		1.16114	1.27823
	8	616	3523.57	9	3.64089	3.98006		0.74829	2.21132
	9	616	3615.79	10	5.26812	5.93409		1.02566	1.01014
	10	616	8343.47	11	6.87981	4.74546		1.07016	2.15814
	11	616	7037.56	12	6.06985	4.12823		0.723963	1.19566
cell02	1	616	4388.25	13	4.38454	2.82118		0.745753	1.43368
	2	616	4550.73	14	5.24469	4.8748		1.57208	2.26257
	3	616	2967.61	15	4.70985	3.52908		1.70708	2.22206
	4	616	5413.78	16	3.9881	2.48347		2.92279	4.94539
	5	616	2647.26	17	4.33219	3.99333		2.01354	3.96613
	6	616	2603.52	18	4.76089	4.43396		2.15995	4.5873
	7	616	3671.18	19	5.4525	4.70304		2.31549	4.87954
	8	616	3366.1	20	3.50872	3.3168		2.22352	4.74575
	9	616	2507.12	21	4.74525	5.13536		1.08256	3.76446
	10	616	2945.26	22	2.53114	2.43346		2.1888	3.54356
	11	616	3959.11	23				2.7247	4.98579
	12	616	4012.4	24				2.22708	4.28587
cell03	1	616	7205.46	25				4.58814	6.97397
	2	616	3628.84	26				3.01193	5.50167
	3	616	6478.98
	4	616	4859.37
	5	616	4191.89
	6	616	4463.51
	7	616	7821.84
	8	616	4767.43
	9	616	5234.95
	10	616	3198.11
	11	616	5219.99
cell04	1	616	4276.05
	2	616	4138.84
	3	616	4576.69
	4	616	3323.83
	5	616	3242.91
	6	616	3110.43
	7	616	4310.72
	8	616	3198.42
	9	616	2187.51
	10	616	4185.06
	11	616	4316.97
cell05	1	616	2795.14
	2	616	3215.64
	3	616	2351.32
	4	616	1568.47
	5	616	1666.29
	6	616	2443.7
	7	616	1899.66
	8	616	1808.3
	9	616	1974.93
	10	616	2290.77
	11	616	1759.93
	12	616	1660.66
	13	616	1834.71
cell06	1	616	1078.94
	2	616	2276.76
	3	616	3023.38
	4	616	1599.16
	5	616	1483.67
	6	616	1288.14
	7	616	1628.09
	8	616	2321.35
	9	616	1527.77
	10	616	1747.33
cell07	1	616	3174.07
	2	616	2668.2
	3	616	2375.38
	4	616	2871.64
	5	616	2330.41
	6	616	2389.46
	7	616	2095.56
	8	616	2021.41
	9	616	2411.41
	10	616	2801.89
	11	616	3754.86
	12	616	2436.2
	13	616	1595.59
cell08	1	616	2422.98
	2	616	1676.53
	3	616	1695.3
	4	616	1430.18
	5	616	1428.73
	6	616	1304.04
	7	616	2640.68
	8	616	3040.91
	9	616	2141.14
cell09	1	616	2423.73
	2	616	2868.65
	3	616	2527.65
	4	616	2178.97
	5	616	2210.58
	6	616	2587.12
	7	616	1513.52
	8	616	1308.33
	9	616	1306.16
	10	616	1960.59
	11	616	2533.19
	12	616	2055.96
cell10	1	616	2326.91
	2	616	4220.43
	3	616	4980.41
	4	616	5194.84
	5	616	3816.87
	6	616	2118.32
	7	616	2598.43
	8	616	5551.83
	9	616	4080.26
	10	616	3317.07
	11	616	4311.71
	12	616	5448.91
	13	616	1722.78
	14	616	2942.13
	15	616	1519.74
	16	616	2270.67
	17	616	6559.28
cell11	1	616	1901.49
	2	616	3016.57
	3	616	1482.29
	4	616	2199.49
	5	616	1825.48
	6	616	2563.7
	7	616	1836.49
cell12	1	616	4092.72
	2	616	4726.63
	3	616	5761.35
	4	616	792.692
	5	616	3182.01
	6	616	2055.93
	7	616	3403.12
	8	616	2463.21
	9	616	2861.53
	10	616	2176.37
	11	616	2134.74
	12	616	1761.89
cell13	1	616	1351.67
	2	616	1725.77
	3	616	1913.67
	4	616	1289.01
	5	616	3568.46
	6	616	1411.88
cell14	1	616	2212
	2	616	2280.23
	3	616	1725.19
	4	616	2246.34
	5	616	1443.75
	6	616	1967.53
	7	616	2735.47
	8	616	1917.54
	9	616	1707.29
	10	616	1685.7
	11	616	2557.61
	12	616	1729.53
cell15	1	616	2265.22
	2	616	1978.27
	3	616	7582.69
	4	616	5942.73
	5	616	3077.63
	6	616	6661.25
	7	616	3070.06
	8	616	3382.81
	9	616	2553.78
	10	616	3759.71
	11	616	1280.19
cell16	1	616	2847.36
	2	616	5987.25
	3	616	3247.51
	4	616	3115.69
	5	616	2500.41
	6	616	3632.97
cell17	1	616	10695.7
	2	616	10407.1
	3	616	7884.13
	4	616	4426.36
	5	616	4015.45
	6	616	6639.13
	7	616	3442.3
	8	616	5728.68
	9	616	5621.21
cell18	1	616	5052.99
	2	665	10141.6
	3	665	4287.41
	4	665	7112.46
	5	665	8907.53
	6	665	3413.46
cell19	1	616	7187.77
	2	616	2745.72
	3	616	6495.02
	4	616	7983.14
	5	616	11416.4
	6	616	9115.23
	7	616	7569.48
	8	616	4209.73
	9	616	3437.2
	10	616	4482.88
	11	616	3647.61
cell20	1	616	10287.9
	2	616	9538.07
	3	616	6617.73
	4	616	4055.74
	5	616	7480.55
	6	616	5536.56
	7	616	9713.66
	8	616	7518.68
	9	616	8798.14
	10	616	8391.2
	11	616	6595.86
	12	616	9061.05
	13	616	9301.32
cell21	1	616	8045.13
	2	616	7406.35
	3	616	7567.09
	4	616	7947.16
	5	616	7130.45
	6	616	3197.16
	7	616	7939.83
	8	616	5984.07
	9	616	3687.94
cell22	1	616	7892.86
	2	616	8187.46
	3	616	4728.68
	4	616	7193.91
	5	616	6518.25
	6	616	8859.4
	7	616	8051.12
	8	616	3763.93
	9	616	3351.72
	10	616	6000.58
	11	616	4377.59
cell23	1	616	6978
	2	616	6243.74
	3	616	5730.17
	4	616	4282.47
	5	616	4984.94
	6	616	3153.62
	7	616	4068.46
	8	616	3004.4
cell24	1	616	6415.85
	2	616	5158.81
	3	616	6456.97
	4	616	6742.87
	5	616	4048.3
	6	616	4024.08
	7	616	4940.11
	8	616	6063.09
	9	616	7906.4
	10	616	5102.91
	11	616	3224.56
	12	616	4755.55
	13	616	3323.84
cell25	1	616	8822.66
	2	616	8102.56
	3	616	7100.7
	4	616	8748.55
	5	616	6919.23
	6	616	4744.49
cell26	1	616	9256.74
	2	616	9116.71
	3	616	6094.34
	4	616	5259.45
	5	616	5394.75
	6	616	2610.35
cell27	1	616	10275.5
	2	616	10780.3
	3	616	8943.34
	4	616	8224.3
	5	616	7530.72
	6	616	12083.9
	7	616	12242.8
	8	616	10201.3
	9	616	7900.94
	10	616	12549.4
	11	616	10952.8
	12	616	7762.05
	13	616	5634.35
	14	616	9092.61
	15	616	10498.6
cell28	1	616	13832.3
	2	616	23501.8
	3	616	16491.3
	4	616	11626.1
	5	616	12732.9
	6	616	10581.7
cell29	1	616	9240.22
	2	616	13488.1
	3	616	5772.3
	4	616	8020.15
	5	616	5646.29
	6	616	6525.92
	7	616	10853.7
	8	616	5093.68
	9	616	9298.66
	10	616	12832.9
