# Supplementary material for: Probing the effect of clustering on EphA2 receptor signaling efficiency by subcellular control of ligand-receptor mobility
Source: eLife. 2021 Aug 20;10:e67379. doi: 10.7554/eLife.67379 (PMC8397371; doi:10.7554/eLife.67379)
Supplement: Figure 3—source data 1. [file elife-67379-fig3-data1.xlsx]

## Sheet: Sheet1
Grb2 intensity	Grb2 intensity in each mobile ephrinA1 corral																				Grb2 intensity in each immobile ephrinA1 corral
	Cell 01				Cell 02							Cell 03									Cell 01				Cell 02							Cell 03
Time point: 30s interval	Corral 1	Corral 2	Corral 3	Corral 4	Corral 1	Corral 2	Corral 3	Corral 4	Corral 5	Corral 6	Corral 7	Corral 1	Corral 2	Corral 3	Corral 4	Corral 5	Corral 6	Corral 7	Corral 8		Corral 1	Corral 2	Corral 3	Corral 4	Corral 1	Corral 2	Corral 3	Corral 4	Corral 5	Corral 6	Corral 7	Corral 1	Corral 2	Corral 3	Corral 4	Corral 5	Corral 6	Corral 7	Corral 8
1	0.23288	0.05627	0.19114	0.17511	0.1772	0.17782	0.07871	0.21323	0.10169	0.14261	0.06817	0.10169	0.31023	0.12575	0.17394	0.18829	0.17451	0.17266	0.10917		0.08314	0.095	0.14362	0.11855	0.02363	0.02424	0.01626	0.0256	0.01313	0.05044	0.02607	0.19156	0.13188	0.18927	0.10536	0.10387	0.16122	0.14122	0.08742
2	0.19474	0.05838	0.27882	0.15166	0.20949	0.13847	0.1068	0.23748	0.09436	0.16277	0.07975	0.1358	0.26145	0.13925	0.19271	0.11217	0.16737	0.17709	0.07915		0.13096	0.13146	0.16694	0.10859	0.02312	0.02787	0.01506	0.02511	0.01528	0.04924	0.03455	0.17495	0.15466	0.18598	0.15949	0.19768	0.16329	0.14882	0.14125
3	0.2134	0.04151	0.36386	0.16073	0.21898	0.11911	0.0605	0.3421	0.12782	0.16625	0.10208	0.16007	0.1997	0.19937	0.21513	0.12858	0.22165	0.24767	0.13084		0.15944	0.11178	0.18738	0.10845	0.03826	0.03123	0.0184	0.03034	0.01368	0.06609	0.0271	0.25789	0.32959	0.12519	0.36232	0.12902	0.1818	0.17446	0.18934
4	0.17555	0.0431	0.51427	0.24038	0.28157	0.10046	0.11286	0.30721	0.16387	0.13671	0.13699	0.23165	0.24669	0.20638	0.21753	0.1052	0.20388	0.132	0.08272		0.19529	0.17938	0.23342	0.14	0.02953	0.04142	0.01665	0.03337	0.00776	0.07015	0.02343	0.28276	0.19655	0.12986	0.2993	0.15089	0.18704	0.29867	0.30344
5	0.191	0.03021	0.4413	0.2975	0.238	0.14525	0.1123	0.33315	0.17472	0.12789	0.09517	0.15051	0.17958	0.19537	0.21876	0.17406	0.15762	0.21655	0.08741		0.17684	0.23911	0.20237	0.15592	0.02418	0.04316	0.01815	0.02654	0.01171	0.06286	0.02533	0.1513	0.20794	0.16856	0.22427	0.15142	0.25066	0.24321	0.33436
6	0.23553	0.06033	0.45426	0.28796	0.23506	0.16121	0.11954	0.33588	0.14188	0.10607	0.10103	0.15478	0.21371	0.18754	0.26803	0.09249	0.17026	0.17067	0.10671		0.15599	0.25245	0.13093	0.14832	0.02792	0.05028	0.02132	0.02973	0.01344	0.06842	0.03266	0.13824	0.33497	0.18399	0.18624	0.17449	0.26604	0.22054	0.30175
7	0.24323	0.04474	0.60494	0.29392	0.28689	0.13307	0.11334	0.33169	0.16085	0.17428	0.08021	0.21275	0.2198	0.27866	0.24837	0.18377	0.19304	0.21494	0.08193		0.15916	0.1748	0.21949	0.16768	0.02584	0.05213	0.0186	0.02645	0.02107	0.05452	0.02105	0.18574	0.17309	0.23818	0.21494	0.21069	0.17302	0.21802	0.27882
8	0.19848	0.05974	0.55886	0.38117	0.23807	0.12954	0.12708	0.33626	0.14719	0.17916	0.07554	0.1617	0.28589	0.32721	0.24388	0.17204	0.18355	0.19333	0.11169		0.15535	0.26893	0.28729	0.2111	0.02649	0.06823	0.01738	0.03472	0.02006	0.06933	0.03566	0.14515	0.25596	0.18427	0.12573	0.16444	0.19436	0.29156	0.31999
9	0.19867	0.06568	0.5585	0.38718	0.32104	0.14575	0.12371	0.36865	0.18276	0.19876	0.09251	0.18055	0.24823	0.22938	0.28426	0.13858	0.26185	0.17202	0.07485		0.13214	0.2221	0.15297	0.17157	0.03077	0.05562	0.01803	0.02582	0.0243	0.06392	0.03889	0.20299	0.16786	0.22193	0.1675	0.2102	0.20734	0.27365	0.21497
10	0.21455	0.06611	0.69215	0.34119	0.3208	0.17683	0.15513	0.40106	0.18218	0.22293	0.07351	0.17148	0.25298	0.33357	0.31163	0.1467	0.19453	0.30175	0.10822		0.10543	0.20484	0.1862	0.13464	0.0396	0.04875	0.02076	0.03757	0.02347	0.06829	0.03938	0.20699	0.17742	0.20477	0.12895	0.20455	0.17076	0.33937	0.25459
11	0.25555	0.05869	0.63258	0.34276	0.29556	0.16579	0.12106	0.3732	0.19033	0.27733	0.08469	0.17071	0.24011	0.36237	0.36138	0.13669	0.19853	0.3169	0.07211		0.12085	0.13087	0.1796	0.20033	0.0445	0.06307	0.02391	0.04041	0.02786	0.07395	0.0531	0.25037	0.23647	0.15197	0.16832	0.12169	0.16261	0.28906	0.25536
12	0.21127	0.09519	0.70583	0.2616	0.22592	0.13252	0.14984	0.3487	0.1611	0.23245	0.0702	0.24277	0.27418	0.26787	0.36453	0.13264	0.22342	0.34208	0.08576		0.13372	0.18858	0.15018	0.19475	0.04801	0.0604	0.01705	0.04506	0.02707	0.074	0.04441	0.29295	0.1972	0.20294	0.1407	0.14063	0.14649	0.34862	0.29017
13	0.23132	0.1432	0.69266	0.38087	0.27416	0.15225	0.18647	0.37561	0.17012	0.24667	0.07907	0.2021	0.1847	0.37974	0.29283	0.20285	0.24625	0.24565	0.1015		0.09629	0.14293	0.22726	0.14561	0.06002	0.0531	0.02589	0.04786	0.027	0.08451	0.04536	0.24121	0.27517	0.18237	0.11798	0.14533	0.11513	0.27942	0.23465
14	0.20403	0.27505	0.69673	0.29123	0.31243	0.16509	0.15585	0.38754	0.15873	0.23273	0.07731	0.2097	0.38577	0.2402	0.2725	0.23719	0.28938	0.31911	0.11974		0.16679	0.14195	0.16466	0.2318	0.05943	0.05134	0.0226	0.04239	0.03874	0.08201	0.04155	0.30562	0.30295	0.22806	0.16521	0.16416	0.10107	0.36518	0.20855
15	0.22303	0.39953	0.63234	0.32751	0.3036	0.19239	0.20423	0.42033	0.20913	0.19774	0.07752	0.24255	0.28455	0.33537	0.37383	0.15257	0.21003	0.34456	0.11423		0.16934	0.19295	0.10012	0.20654	0.07039	0.07181	0.02089	0.05026	0.05041	0.10279	0.04135	0.27031	0.22052	0.23309	0.16271	0.26587	0.07417	0.31562	0.2254
16	0.23435	0.36216	0.69325	0.34209	0.26019	0.19514	0.19188	0.42258	0.21542	0.22316	0.07861	0.31444	0.29968	0.35265	0.2976	0.19079	0.23347	0.32675	0.10321		0.21412	0.17884	0.18575	0.30702	0.07498	0.05433	0.0255	0.04065	0.03945	0.10535	0.05136	0.31476	0.24563	0.20687	0.16663	0.18259	0.08713	0.29889	0.21895
17	0.23843	0.31163	0.75578	0.35711	0.29578	0.26066	0.18611	0.44927	0.1806	0.20202	0.07981	0.20633	0.37309	0.4063	0.36309	0.1495	0.21986	0.31293	0.14111		0.19972	0.16067	0.15441	0.2548	0.09039	0.0619	0.02278	0.06625	0.05146	0.12509	0.07016	0.25441	0.19074	0.17838	0.13428	0.16949	0.10392	0.32692	0.22573
18	0.23358	0.35735	0.63076	0.31417	0.3773	0.20377	0.17159	0.51007	0.22713	0.19037	0.09189	0.30803	0.32627	0.58462	0.32682	0.20203	0.19439	0.33441	0.13248		0.16307	0.12591	0.18535	0.26605	0.10548	0.04127	0.02675	0.05484	0.05568	0.12821	0.06497	0.38203	0.22604	0.17733	0.12044	0.18706	0.06729	0.30504	0.22907
19	0.31977	0.42283	0.56808	0.36584	0.49218	0.18156	0.20596	0.59622	0.27113	0.18505	0.08736	0.18776	0.42414	0.34603	0.29038	0.19816	0.2017	0.33573	0.11667		0.20445	0.13518	0.22753	0.24225	0.11195	0.03997	0.02288	0.04916	0.06023	0.13737	0.05006	0.26955	0.29748	0.18052	0.15014	0.19903	0.09683	0.42361	0.20288
20	0.27727	0.58021	0.5544	0.36679	0.46983	0.20136	0.17248	0.61869	0.26902	0.18659	0.08917	0.2665	0.26	0.75132	0.39316	0.16838	0.22953	0.41118	0.11078		0.20302	0.13803	0.27281	0.37246	0.11538	0.06007	0.02708	0.06249	0.08185	0.14839	0.05786	0.3106	0.24219	0.30759	0.19105	0.21867	0.05602	0.27524	0.19485
21	0.30381	0.60329	0.49583	0.34466	0.44516	0.21819	0.18175	0.65433	0.2211	0.20719	0.08893	0.25291	0.50215	0.75478	0.23455	0.19617	0.2307	0.38845	0.12005		0.13495	0.14285	0.21124	0.28402	0.09467	0.09762	0.02702	0.0458	0.09811	0.1298	0.05544	0.32663	0.28346	0.18069	0.15659	0.15139	0.064	0.41669	0.19326
22	0.30423	0.47888	0.55733	0.42521	0.43178	0.23064	0.15573	0.64116	0.22112	0.19232	0.09041	0.20174	0.53638	0.47489	0.34559	0.19966	0.27495	0.33757	0.09268		0.16974	0.14945	0.22406	0.24967	0.13243	0.07423	0.04397	0.05943	0.07238	0.12368	0.04513	0.20771	0.31644	0.16651	0.17281	0.14815	0.06545	0.39489	0.17535
23	0.30657	0.5631	0.4648	0.30227	0.49892	0.22771	0.16224	0.66172	0.20515	0.20294	0.07469	0.27195	0.40928	0.49239	0.45358	0.24654	0.27707	0.32394	0.15815		0.18578	0.11524	0.22163	0.30184	0.10283	0.08507	0.04865	0.06367	0.08564	0.1279	0.04856	0.33817	0.27541	0.15944	0.17324	0.19543	0.05963	0.37193	0.19047
24	0.27369	0.5387	0.51537	0.2432	0.43218	0.22813	0.22989	0.64538	0.2299	0.1823	0.07853	0.31127	0.47079	0.48523	0.32175	0.16975	0.21931	0.54157	0.11238		0.19934	0.16397	0.18172	0.33439	0.1144	0.09383	0.04959	0.07079	0.05256	0.13799	0.0919	0.31521	0.31406	0.23732	0.16663	0.16846	0.05874	0.29702	0.18064
25	0.29526	0.55406	0.45818	0.28478	0.42928	0.25755	0.19545	0.73952	0.24318	0.17498	0.06961	0.31127	0.69066	0.42962	0.38655	0.25563	0.25842	0.38362	0.11529		0.2144	0.12159	0.23666	0.38626	0.18455	0.09326	0.09814	0.06314	0.06204	0.15134	0.08467	0.20194	0.27118	0.19987	0.20828	0.16021	0.07499	0.35455	0.18514
26	0.27482	0.6105	0.54162	0.2815	0.46975	0.20701	0.17404	0.70205	0.24164	0.17854	0.08381	0.21467	0.58802	0.8818	0.23614	0.1773	0.24806	0.3803	0.14147		0.34578	0.11564	0.23468	0.30773	0.1796	0.08904	0.09861	0.06673	0.05258	0.15374	0.0757	0.21559	0.27836	0.18786	0.15492	0.22732	0.07833	0.28991	0.18048
27	0.31619	0.65148	0.60085	0.29849	0.50582	0.25064	0.15816	0.81837	0.27711	0.17775	0.13145	0.28524	0.94066	0.56877	0.30296	0.22273	0.27723	0.43113	0.13327		0.2311	0.18	0.21116	0.29222	0.18439	0.09503	0.07897	0.08627	0.05807	0.18458	0.08697	0.15613	0.29678	0.1644	0.13252	0.14683	0.05754	0.43036	0.18437
28	0.38879	0.64429	0.67535	0.31165	0.53302	0.21366	0.14776	0.78117	0.27118	0.15469	0.12431	0.40873	0.86077	0.52577	0.41495	0.23708	0.25765	0.45413	0.09493		0.31746	0.12601	0.1594	0.27688	0.18668	0.11824	0.07265	0.08764	0.04758	0.20717	0.07406	0.20583	0.28666	0.26072	0.18071	0.2139	0.06258	0.35266	0.18689
29	0.37227	0.7331	0.54611	0.30444	0.60252	0.24229	0.15906	0.83543	0.3155	0.16528	0.14306	0.36804	0.59379	0.56183	0.41954	0.16558	0.30757	0.50165	0.08445		0.35537	0.13431	0.24264	0.35154	0.21472	0.10091	0.08384	0.09639	0.05034	0.20225	0.06413	0.21953	0.28976	0.21015	0.15137	0.20864	0.06175	0.2638	0.18555
30	0.32903	0.74834	0.59341	0.30592	0.54486	0.24403	0.14225	0.84786	0.2961	0.16419	0.1248	0.23785	0.74031	0.61076	0.44725	0.10818	0.48278	0.47417	0.08527		0.33092	0.19391	0.25152	0.42678	0.22353	0.10942	0.11901	0.10263	0.0577	0.17483	0.07877	0.22444	0.34708	0.20485	0.20369	0.16009	0.08446	0.22569	0.19978
31	0.2681	0.67738	0.566	0.37765	0.54118	0.28363	0.15548	0.88799	0.30244	0.15364	0.10066	0.42094	0.9432	0.50861	0.58697	0.11995	0.26698	0.57591	0.11664		0.25177	0.15845	0.25411	0.37052	0.24618	0.10003	0.15235	0.14381	0.05339	0.20572	0.06393	0.22854	0.29613	0.30103	0.23484	0.15151	0.08939	0.32802	0.1947
32	0.20087	0.67701	0.46703	0.32054	0.63678	0.23808	0.12169	0.92029	0.32768	0.14611	0.11256	0.38294	0.72529	0.34946	0.30877	0.20732	0.2769	0.37826	0.10501		0.34301	0.13761	0.24448	0.34377	0.2473	0.0889	0.12914	0.13284	0.05741	0.20787	0.10247	0.16022	0.29933	0.2117	0.28767	0.13654	0.08946	0.23813	0.16588
33	0.23083	0.52972	0.55286	0.31493	0.56223	0.25187	0.13635	0.93895	0.34286	0.14704	0.12922	0.53142	0.84678	0.331	0.40212	0.1785	0.2608	0.57127	0.12859		0.33799	0.14052	0.24845	0.43093	0.26605	0.09291	0.13201	0.12858	0.05863	0.20027	0.1023	0.18408	0.37265	0.27618	0.25334	0.19569	0.07703	0.31112	0.17976
34	0.22168	0.60126	0.51613	0.3244	0.59847	0.30634	0.13414	0.97819	0.32806	0.16812	0.15475	0.43336	0.89405	0.48047	0.43154	0.18459	0.22222	0.58397	0.09587		0.38983	0.14324	0.39822	0.37956	0.29833	0.09474	0.16386	0.14898	0.0723	0.27078	0.09991	0.23515	0.24178	0.24453	0.23933	0.12907	0.08898	0.37611	0.20258
35	0.22278	0.52168	0.62463	0.31472	0.5231	0.29097	0.12983	0.97016	0.32971	0.14512	0.12945	0.30843	0.99205	0.33439	0.43728	0.12375	0.22879	0.49035	0.12197		0.309	0.12999	0.32861	0.40108	0.27409	0.11499	0.16349	0.15796	0.05437	0.23206	0.10571	0.16476	0.25503	0.17137	0.26233	0.19864	0.09222	0.37981	0.1959
36	0.28932	0.44495	0.46703	0.2944	0.52234	0.28381	0.13829	0.96698	0.35184	0.13547	0.11618	0.3093	0.81816	0.28863	0.41448	0.20557	0.29226	0.52025	0.15634		0.3097	0.13496	0.31456	0.47145	0.27841	0.12248	0.18748	0.15915	0.07847	0.23605	0.10444	0.16971	0.26479	0.27294	0.17415	0.21001	0.07549	0.33353	0.18631
37	0.24154	0.42269	0.51597	0.33473	0.61376	0.25435	0.14225	0.99058	0.35356	0.14341	0.10593	0.40743	0.6999	0.37426	0.35778	0.13419	0.23409	0.47167	0.15039		0.42903	0.13216	0.32116	0.49343	0.28956	0.13017	0.19532	0.14282	0.07829	0.23782	0.10693	0.19912	0.32463	0.18042	0.17661	0.17999	0.06167	0.37518	0.19939
38	0.17771	0.46663	0.59494	0.30844	0.62302	0.27286	0.13491	1	0.34889	0.13414	0.11328	0.41144	1	0.2463	0.39825	0.18403	0.29726	0.62504	0.09919		0.47007	0.17726	0.28814	0.4456	0.31618	0.13677	0.17831	0.17616	0.07972	0.27289	0.08628	0.1885	0.26335	0.24637	0.11599	0.13894	0.05299	0.56885	0.14909
39	0.21427	0.44167	0.52084	0.34149	0.69393	0.31938	0.14204	0.90845	0.42495	0.15477	0.12826	0.45995	0.67513	0.38469	0.50422	0.13584	0.25965	0.44117	0.10743		0.54594	0.17278	0.28215	0.39209	0.26511	0.13607	0.16884	0.23168	0.08944	0.26288	0.11791	0.22249	0.47889	0.1878	0.1576	0.1667	0.05049	0.36715	0.19638
40	0.17864	0.41023	0.70371	0.31053	0.68756	0.2789	0.14692	0.88727	0.43564	0.16831	0.14856	0.61411	0.94672	0.46372	0.39385	0.09215	0.29159	0.6062	0.07213		0.47132	0.10884	0.3325	0.36307	0.28715	0.18366	0.15937	0.22048	0.08589	0.28418	0.09238	0.20989	0.39988	0.32103	0.16678	0.17149	0.06663	0.55541	0.14683
41	0.18435	0.41462	0.85751	0.35628	0.71014	0.30074	0.13196	0.94476	0.43312	0.18591	0.11225	0.45295	0.92741	0.23638	0.41027	0.17536	0.28289	0.56752	0.09561		0.59454	0.14079	0.28918	0.3862	0.30813	0.17019	0.15573	0.21354	0.08369	0.28191	0.0942	0.22417	0.27962	0.21508	0.17499	0.18014	0.06136	0.45469	0.16245
42	0.19427	0.43959	0.67026	0.33228	0.69927	0.30145	0.16554	0.94749	0.52098	0.18554	0.11448	0.36047	0.73533	0.33382	0.3797	0.24393	0.25399	0.54522	0.092		0.56157	0.15001	0.34315	0.41747	0.31293	0.25574	0.16244	0.25282	0.0716	0.26436	0.09146	0.24111	0.29055	0.17761	0.16031	0.18643	0.06842	0.41351	0.17946
43	0.17012	0.405	0.86826	0.30822	0.76208	0.28457	0.12712	0.9219	0.40408	0.16571	0.12701	0.32189	0.8306	0.24619	0.3362	0.11647	0.29019	0.46375	0.10046		0.52468	0.15453	0.32311	0.36419	0.30791	0.25361	0.18788	0.20563	0.08314	0.26824	0.10817	0.19191	0.2246	0.1592	0.1474	0.11769	0.06867	0.39251	0.14173
44	0.17552	0.33695	0.91694	0.33306	0.77932	0.29721	0.13501	0.89588	0.44939	0.17953	0.11818	0.43219	0.62792	0.33341	0.34927	0.13955	0.25693	0.39686	0.08765		0.47867	0.09659	0.30977	0.41582	0.28471	0.25333	0.16401	0.18546	0.07572	0.27535	0.11254	0.1897	0.21604	0.14247	0.1337	0.18614	0.05371	0.4058	0.17629
45	0.19785	0.43666	0.77067	0.34837	0.66712	0.37876	0.14641	0.92278	0.48025	0.18345	0.10275	0.2171	0.78749	0.2296	0.33244	0.15658	0.27457	0.44293	0.07071		0.43172	0.12213	0.31202	0.40685	0.29689	0.20621	0.12827	0.19554	0.08302	0.26024	0.11918	0.19304	0.20866	0.16505	0.11416	0.14572	0.05915	0.4711	0.16553
46	0.20337	0.5044	0.65981	0.34406	0.72303	0.35958	0.13622	0.88587	0.47837	0.16122	0.14028	0.19956	0.6193	0.40101	0.28866	0.1613	0.25202	0.5625	0.10445		0.3935	0.12915	0.32897	0.44308	0.31597	0.22011	0.17077	0.25457	0.07062	0.27119	0.11826	0.19763	0.22756	0.21866	0.13039	0.2066	0.07902	0.48639	0.16216
47	0.17424	0.51001	0.79067	0.33013	0.62954	0.38944	0.15402	0.9493	0.52275	0.17172	0.11551	0.16322	0.78455	0.43743	0.52027	0.18425	0.32776	0.64987	0.08667		0.4261	0.14042	0.38803	0.4096	0.31618	0.24769	0.15467	0.23786	0.07749	0.25537	0.09932	0.13529	0.16045	0.20264	0.11282	0.14937	0.06172	0.62107	0.16588
48	0.18343	0.46839	0.57778	0.38148	0.78283	0.39199	0.1514	0.9449	0.49266	0.19244	0.10293	0.2077	0.72101	0.32108	0.47168	0.25388	0.19819	0.47985	0.07799		0.40163	0.18899	0.33783	0.39942	0.30778	0.26382	0.12962	0.21537	0.09584	0.26466	0.09379	0.21107	0.22564	0.11078	0.12541	0.14846	0.06607	0.53008	0.16038
49	0.14156	0.45989	0.74961	0.37805	0.71329	0.41777	0.15091	0.95487	0.62252	0.17204	0.12998	0.26579	0.75689	0.24527	0.56455	0.11688	0.31706	0.6286	0.06489		0.4086	0.2231	0.34462	0.53421	0.32923	0.28759	0.16711	0.27215	0.10062	0.2485	0.10865	0.23052	0.1488	0.12678	0.12034	0.17593	0.07117	0.49552	0.15115
50	0.15258	0.48709	0.68169	0.3156	0.78977	0.38757	0.14856	0.91096	0.57452	0.16561	0.13412	0.28378	0.53921	0.2664	0.44509	0.21891	0.2856	0.57462	0.10128		0.42613	0.15177	0.29504	0.3926	0.38465	0.32908	0.16867	0.25365	0.1041	0.25128	0.11882	0.14505	0.17667	0.11772	0.1144	0.13339	0.06857	0.45654	0.15134
51	0.16799	0.56736	0.73327	0.42221	0.80438	0.38485	0.15203	0.99493	0.55058	0.18382	0.13019	0.23816	0.46329	0.27644	0.57723	0.26555	0.29584	0.59469	0.06246		0.57764	0.17154	0.27363	0.41714	0.3492	0.31468	0.13904	0.28735	0.10703	0.27958	0.12818	0.17187	0.206	0.23493	0.11757	0.17596	0.08039	0.35931	0.19136
52	0.1259	0.53635	0.65918	0.35951	0.7214	0.40804	0.13644	0.91372	0.62583	0.19367	0.148	0.23215	0.42075	0.43697	0.29247	0.16641	0.21121	0.38948	0.08775		0.50197	0.15002	0.2965	0.41431	0.33974	0.30091	0.14235	0.28708	0.07692	0.25791	0.11288	0.16992	0.16992	0.16452	0.12697	0.12142	0.051	0.31255	0.17122
53	0.14494	0.59214	0.6846	0.32415	0.79001	0.36568	0.1113	0.9228	0.54372	0.20835	0.14973	0.23308	0.69628	0.42762	0.30214	0.17225	0.23306	0.51169	0.08282		0.45143	0.14971	0.3977	0.43166	0.38284	0.3279	0.17834	0.27392	0.08335	0.25311	0.11527	0.10938	0.17875	0.12765	0.10625	0.19115	0.05074	0.37395	0.18016
54	0.20778	0.57308	0.8129	0.34844	0.84985	0.41861	0.12343	0.88079	0.53838	0.18605	0.15015	0.23624	0.65066	0.21676	0.45064	0.16636	0.19614	0.38229	0.08532		0.5829	0.18858	0.33641	0.43313	0.38173	0.34156	0.17548	0.30268	0.08374	0.25271	0.10989	0.11489	0.14423	0.13262	0.14985	0.12275	0.07403	0.55527	0.16298
55	0.16417	0.52773	0.79323	0.36818	0.84886	0.34133	0.12013	0.81395	0.56472	0.20754	0.14367	0.26697	0.40164	0.29065	0.40568	0.17391	0.24583	0.48749	0.1021		0.57054	0.19788	0.30308	0.36366	0.36189	0.32707	0.15261	0.27216	0.09732	0.25481	0.11541	0.13663	0.17404	0.11887	0.13695	0.18771	0.09313	0.31649	0.20867
56	0.16615	0.46872	0.81631	0.28988	0.84094	0.35892	0.11808	0.87045	0.57027	0.20695	0.15308	0.19883	0.55798	0.19954	0.42582	0.23268	0.2273	0.61747	0.11678		0.61761	0.17845	0.34928	0.345	0.38954	0.30531	0.16262	0.2758	0.10563	0.25271	0.11334	0.12376	0.14368	0.18629	0.1146	0.18805	0.07162	0.44271	0.17518
57	0.1576	0.44977	0.79668	0.33142	0.90584	0.45601	0.12142	0.80397	0.60076	0.18099	0.16762	0.19078	0.57505	0.19898	0.50611	0.17656	0.17574	0.35729	0.08821		0.44686	0.21979	0.37427	0.45378	0.39191	0.33081	0.19551	0.31582	0.10776	0.24803	0.11683	0.13291	0.15385	0.12443	0.13717	0.1601	0.06294	0.34679	0.18626
58	0.14596	0.33884	0.71447	0.31551	0.90597	0.45572	0.12983	0.76437	0.71355	0.1841	0.21103	0.28824	0.68363	0.16839	0.402	0.15915	0.20228	0.58706	0.14358		0.49365	0.19074	0.3671	0.51074	0.4191	0.35948	0.16639	0.30334	0.10012	0.26908	0.11817	0.14204	0.1238	0.1786	0.11743	0.15043	0.07614	0.46949	0.19424
59	0.17655	0.38787	0.93282	0.29614	0.96061	0.46601	0.10042	0.74753	0.70186	0.185	0.23562	0.37318	0.42815	0.19997	0.27502	0.13962	0.16076	0.47853	0.09433		0.54234	0.19805	0.32285	0.38431	0.40127	0.34309	0.17068	0.28857	0.13592	0.25048	0.12496	0.09672	0.12515	0.07938	0.11085	0.14173	0.07677	0.31279	0.16517
60	0.15368	0.4034	1	0.31956	0.90992	0.43627	0.10539	0.80846	0.64554	0.19204	0.20161	0.32747	0.61677	0.27484	0.43452	0.10267	0.19124	0.60579	0.08939		0.58576	0.22269	0.27595	0.42797	0.43803	0.33273	0.17833	0.34744	0.13537	0.23492	0.11697	0.08837	0.15039	0.13538	0.11895	0.17406	0.10428	0.38767	0.20573
70
