# Supplementary material for: Probing the effect of clustering on EphA2 receptor signaling efficiency by subcellular control of ligand-receptor mobility
Source: eLife. 2021 Aug 20;10:e67379. doi: 10.7554/eLife.67379 (PMC8397371; doi:10.7554/eLife.67379)
Supplement: Figure 4—source data 1. [file elife-67379-fig4-data1.xlsx]

## Sheet: Sheet1
	PLL-EphrinA1		Supported membrane_EphrinA1
	Nuclear pErk intensity		Nuclear pErk intensity
cell #		cell #
1	1202.39	1	1287.35
2	1001.38	2	1899.85
3	1741.06	3	927.846
4	1517.09	4	1716.42
5	1791.04	5	1961.4
6	1203.48	6	1846.38
7	1460.1	1	1279.66
8	1703.04	2	1537.1
9	1289.7	3	1315
10	1465.98	4	1569.48
11	1286.55	5	925.425
12	814.099	6	706.797
13	1259.29	7	572.404
14	1206.32	8	1767.73
15	1228.19	9	1084.26
16	938.052	10	1252.25
17	924.895	11	401.097
18	1039.92	12	619.424
19	1314.29	13	1158.22
20	1170.65	14	1054.68
21	1089.41	15	906.072
22	1331.97	16	519.6
23	683.254	17	1334.84
24	970.565	18	966.952
25	707.073	19	1583.19
26	718.235	20	1294.53
27	905.439	21	1366.51
28	729.222	22	1362.6
29	849.079	23	1453.21
30	1377.9	24	1791.13
31	725.446	25	1047.1
32	944.367	26	1131.72
33	1001.41	27	1573.35
34	1084.01	28	1277.04
35	918.661	29	1577.61
36	1399.03	30	962.751
37	1099.27	31	767.157
38	1417.78	32	925.627
39	688.577	33	1824.07
40	990.349	34	1618.59
41	925.018	35	941.045
42	850.411	36	1978.73
43	788.817	37	1106.71
44	1414.39	38	1318.78
45	1578.96	39	1556.51
46	1300.55	40	1557.15
47	1097.9	41	1419.83
48	1700.26	42	1204.33
49	1084.96	43	1827.22
50	760.299	44	1448.89
51	822.05	45	1626.65
52	938.292	46	1437.66
53	595.932	47	1487.18
54	427.982	48	2253.21
55	322.419	49	1847.31
56	469.946	50	1629.72
57	858.982	51	2039.92
58	834.415	52	1764.28
59	914.404	53	2548.25
60	575.625	54	2282.33
61	1075.01	55	2406.38
62	654.632	56	1143.37
63	690.686	57	1262.92
64	2157.83	58	2718.89
65	1619.09	59	2147.05
66	920.517	60	1522.84
67	1316.36	61	2301.79
68	520.922	62	2662.53
69	710.026	63	2040.59
70	1043.98	64	1332.2
71	977.417	65	1990.64
72	642.669	66	1248.9
73	624.703	67	1742.48
74	624.418	68	1944.67
75	880.928	69	2371.91
76	889.474	70	977.843
77	912.085	71	1824.34
78	755.255	72	1926.55
79	619.77	73	1780.84
80	970.12	74	2787.84
81	803.005	75	2096.66
82	731.455	76	2089.22
		77	896.203
		78	1346.25
		79	1463.89
		80	2594.7
		81	1678.09
		82	2731.09
		83	1343.41
		84	1150.25
		85	2547.19
		86	1472.96
		87	1521.27
		88	1871.1
		89	1508.3
		90	1701.24
		91	1461.81
		92	1457.36
		93	1747.42
		94	2482.45
		95	1744.95
		96	922.531
		97	2640.81
		98	2565.66
		99	1366.54
		100	887.922
		101	1789.2
		102	1529.31
		103	1935.74
