# Supplementary material for: Probing the effect of clustering on EphA2 receptor signaling efficiency by subcellular control of ligand-receptor mobility
Source: eLife. 2021 Aug 20;10:e67379. doi: 10.7554/eLife.67379 (PMC8397371; doi:10.7554/eLife.67379)
Supplement: Figure 5—source data 1. [file elife-67379-fig5-data1.xlsx]

## Sheet: Sheet1
cell #	F-tractin-EGFP/Immobile ephrinA1	F-tractin-EGFP/Mobile ephrinA1
1	0.73346	1.84172
2	0.84145	2.03869
3	1.41494	2.2176
4	0.59922	1.25461
5	1.08663	2.13081
6	1.19987	3.28904
7	1.3451	1.99728
8	0.77198	0.75245
9	0.42712	1.44885
10	1.47046	1.89522
11	0.50879	1.33045
12	1.30753	1.2479
13	0.50689	0.68502
14	0.86581	1.32037
15	1.57557	1.24329
16	0.91844	1.56443
17	1.61072	3.04312
18	0.46494	1.52694
19	1.35107	1.34771
