# Supplementary material for: Probing the effect of clustering on EphA2 receptor signaling efficiency by subcellular control of ligand-receptor mobility
Source: eLife journal article supplement (doi:10.7554/elife.67379), 2021-08-20

# Figure 1 - figure supplement 2

A

## 3-component micropattern

1. Coat **PLL-PEG-Biotin**

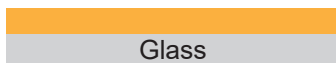

2. First UV etch

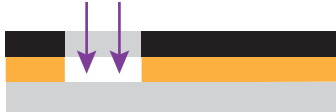

3. Coat **PLL-PEG-NTA**

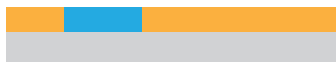

4. Second UV etch

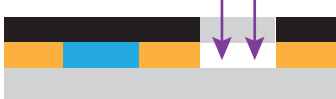

5. Selfassembly of **lipid bilayer**

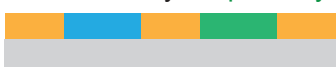

6. Differential functionalization

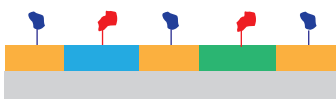

B

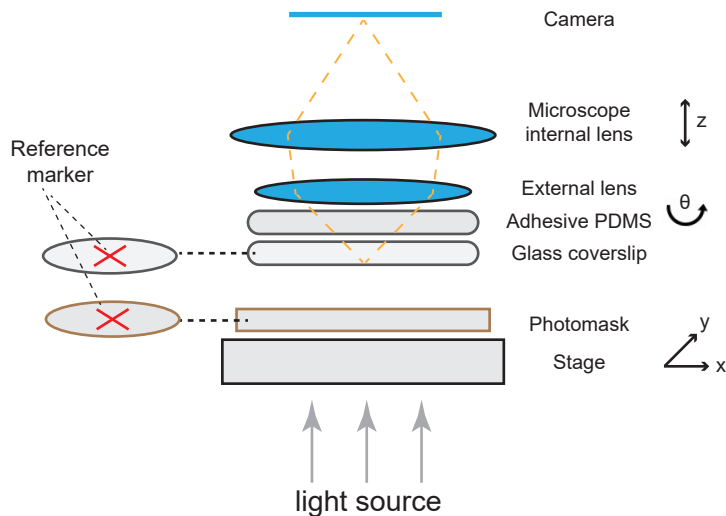

EphrinA1/RGD/PEG

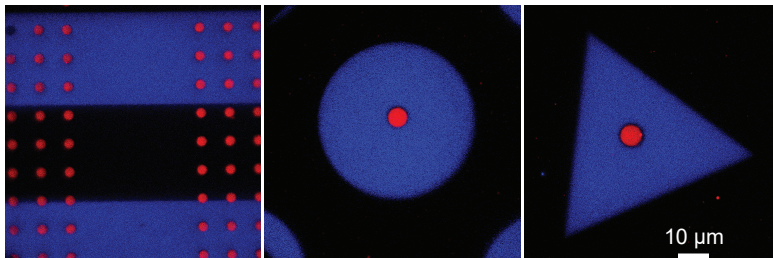

Supplement: supp [file elife-67379-supp-v1.zip]
