# Supplementary figures and images for: Probing the effect of clustering on EphA2 receptor signaling efficiency by subcellular control of ligand-receptor mobility
Source: eLife journal article supplement (doi:10.7554/elife.67379), 2021-08-20

Figure 1 - figure supplement 1

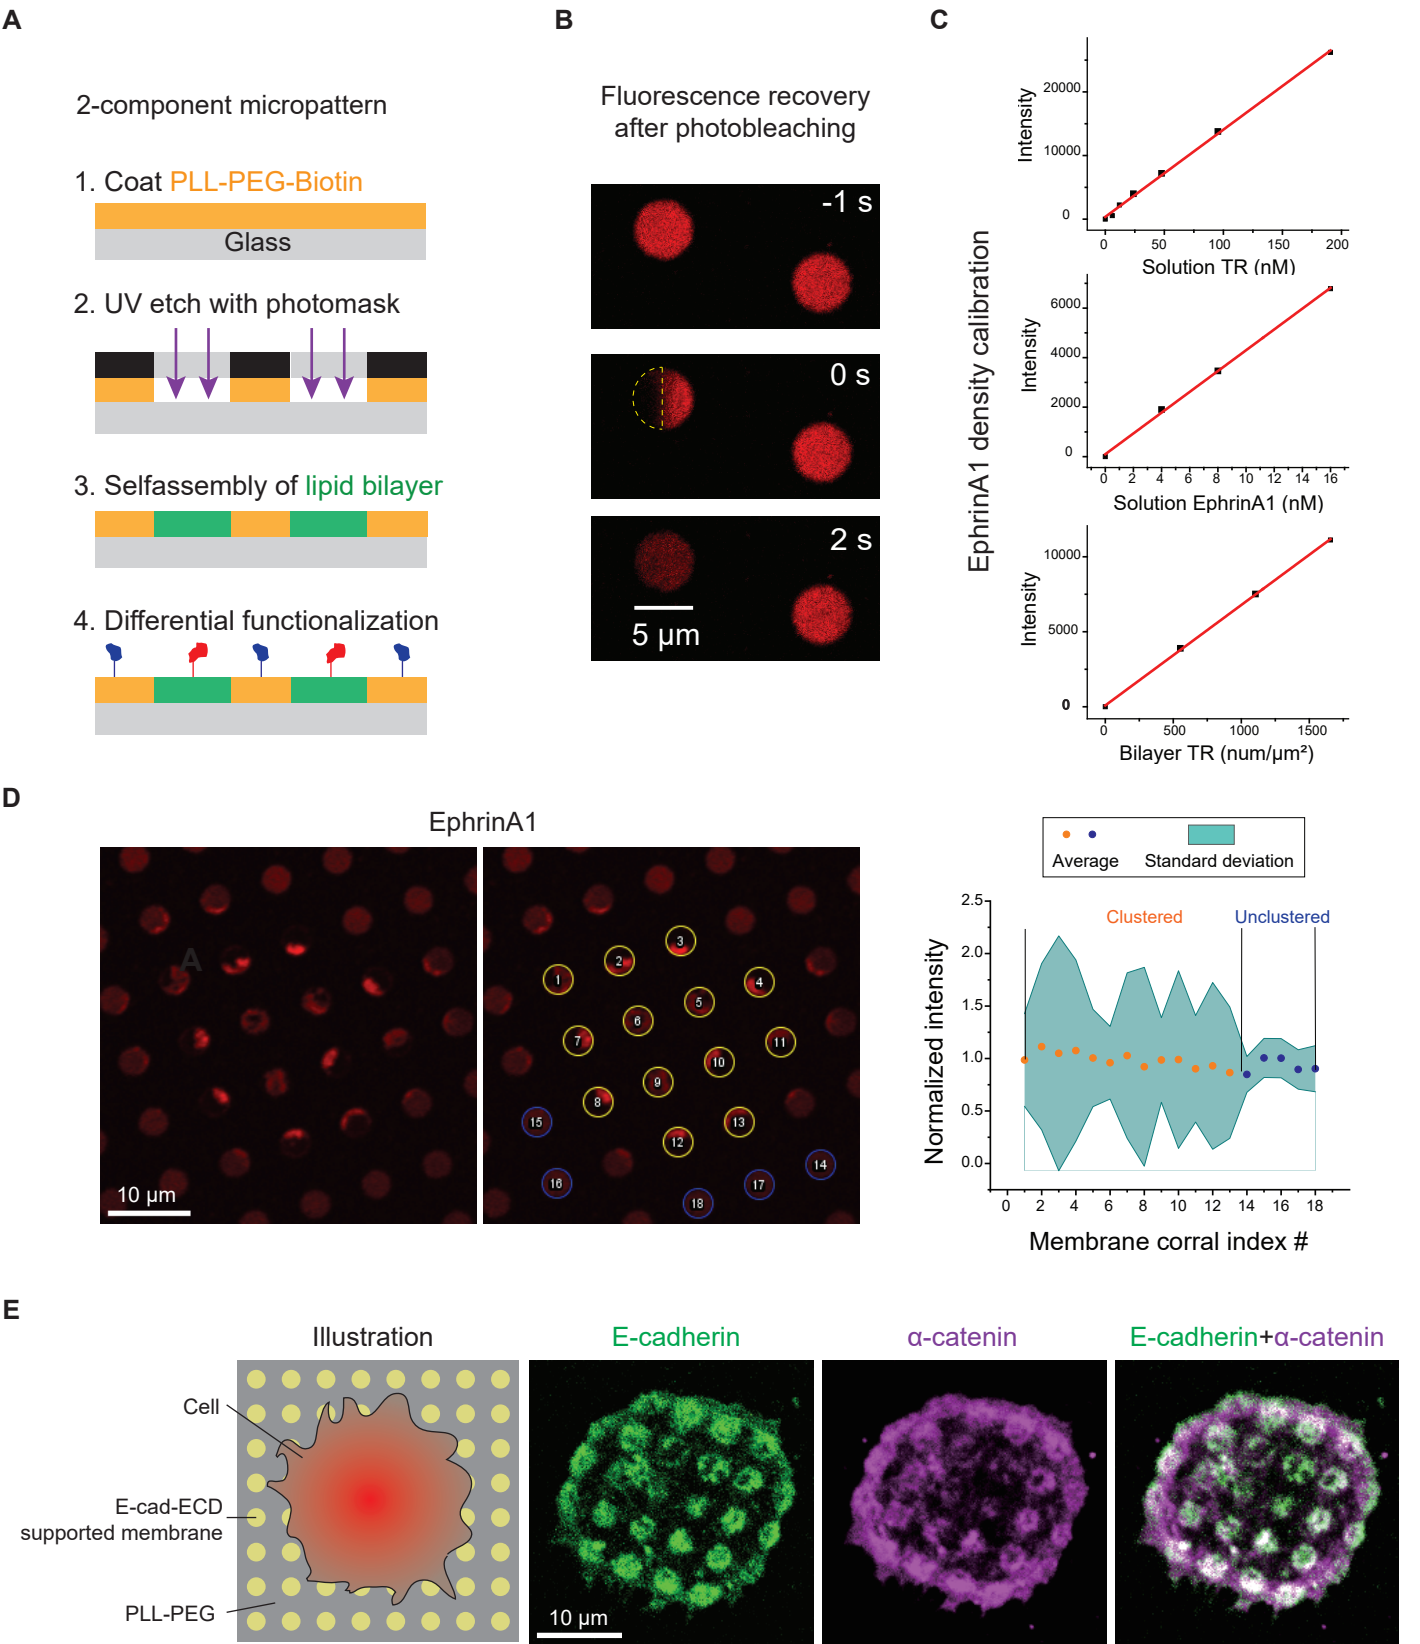

Supplement: supp [file elife-67379-supp-v1.zip]

Figure 3 - figure supplement 1

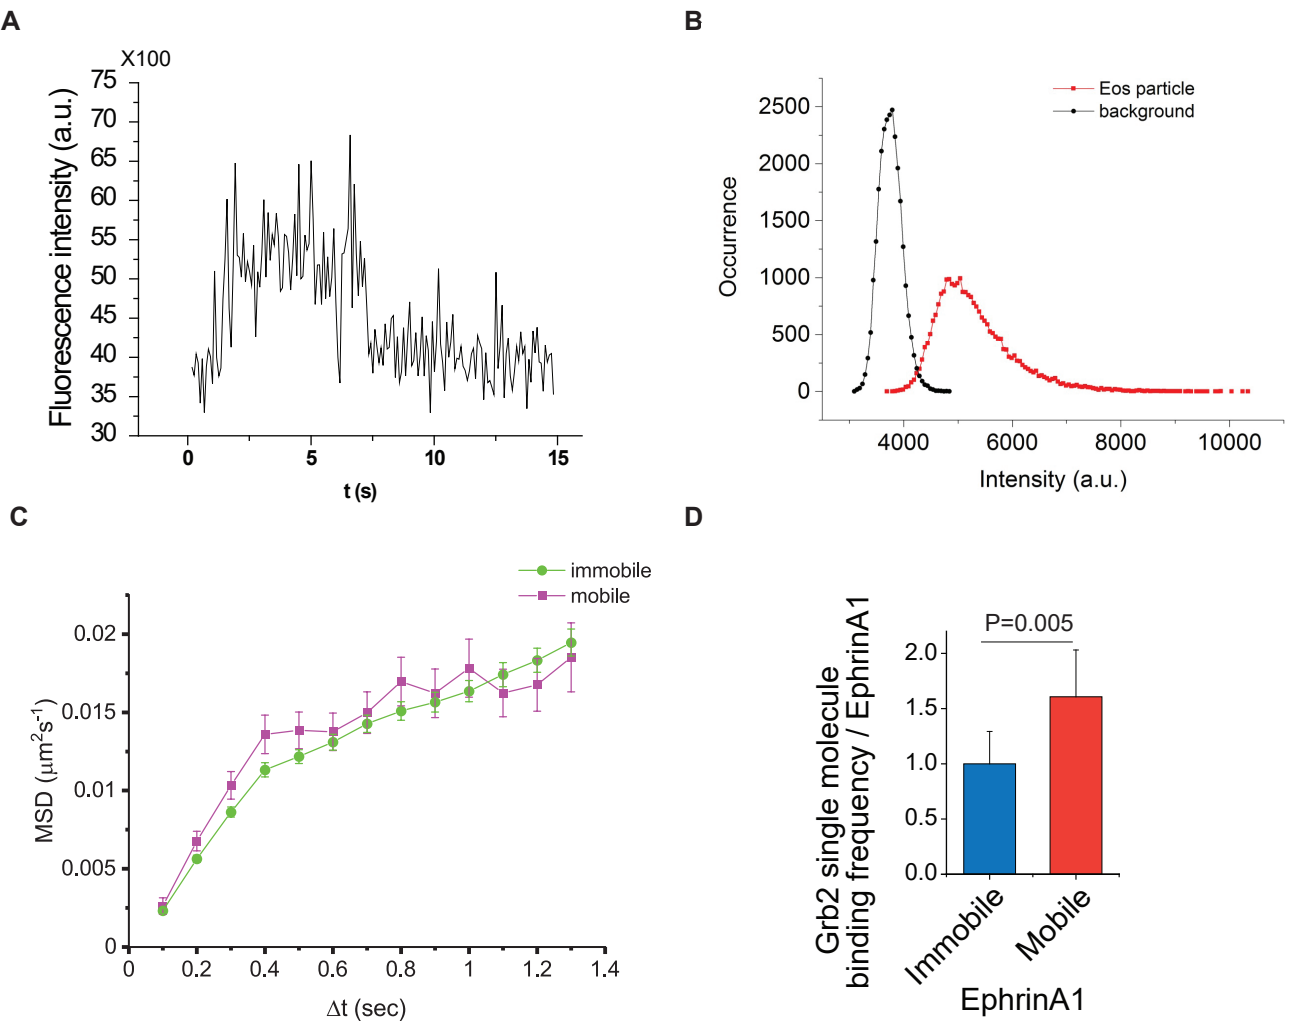

Supplement: supp [file elife-67379-supp-v1.zip]

# Figure 2 - figure supplement 1

A

EphA2

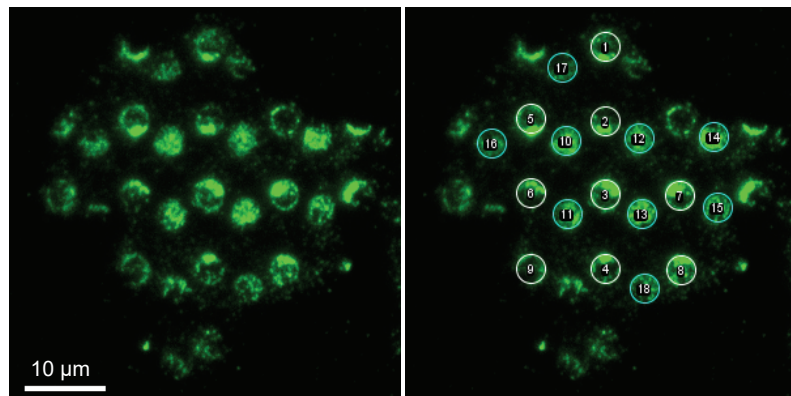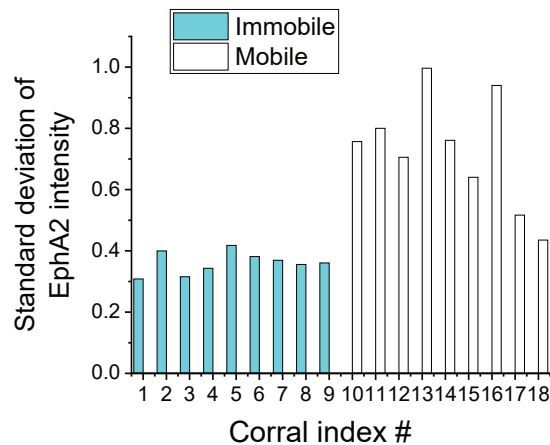

B

pY588-EphA2

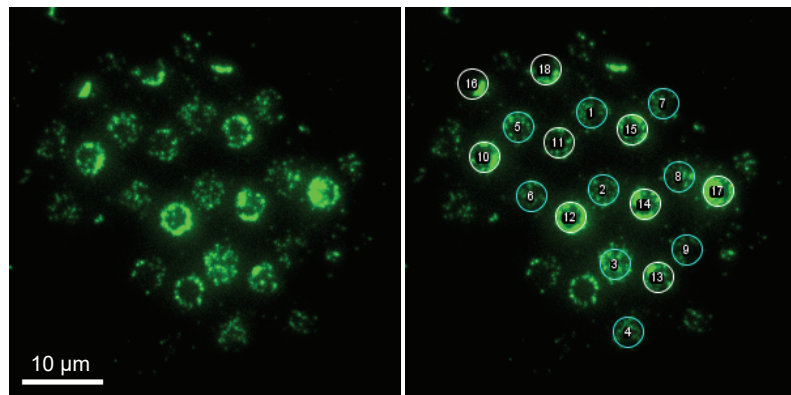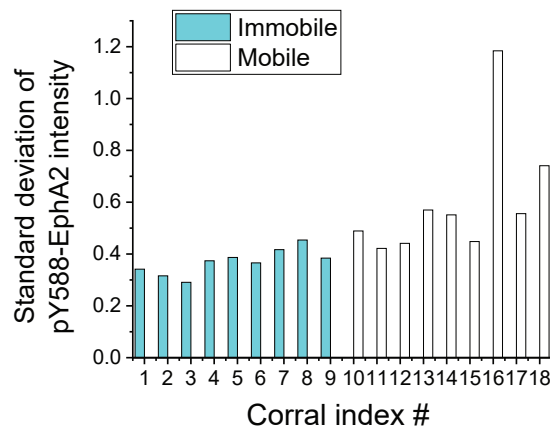

Supplement: supp [file elife-67379-supp-v1.zip]
